# Supplementary material
Source: publisher figshare collection journal article supplement (https://acs.figshare.com/ndownloader/files/3804196)
Supplement: Supplementary file 1 [file 3804196]

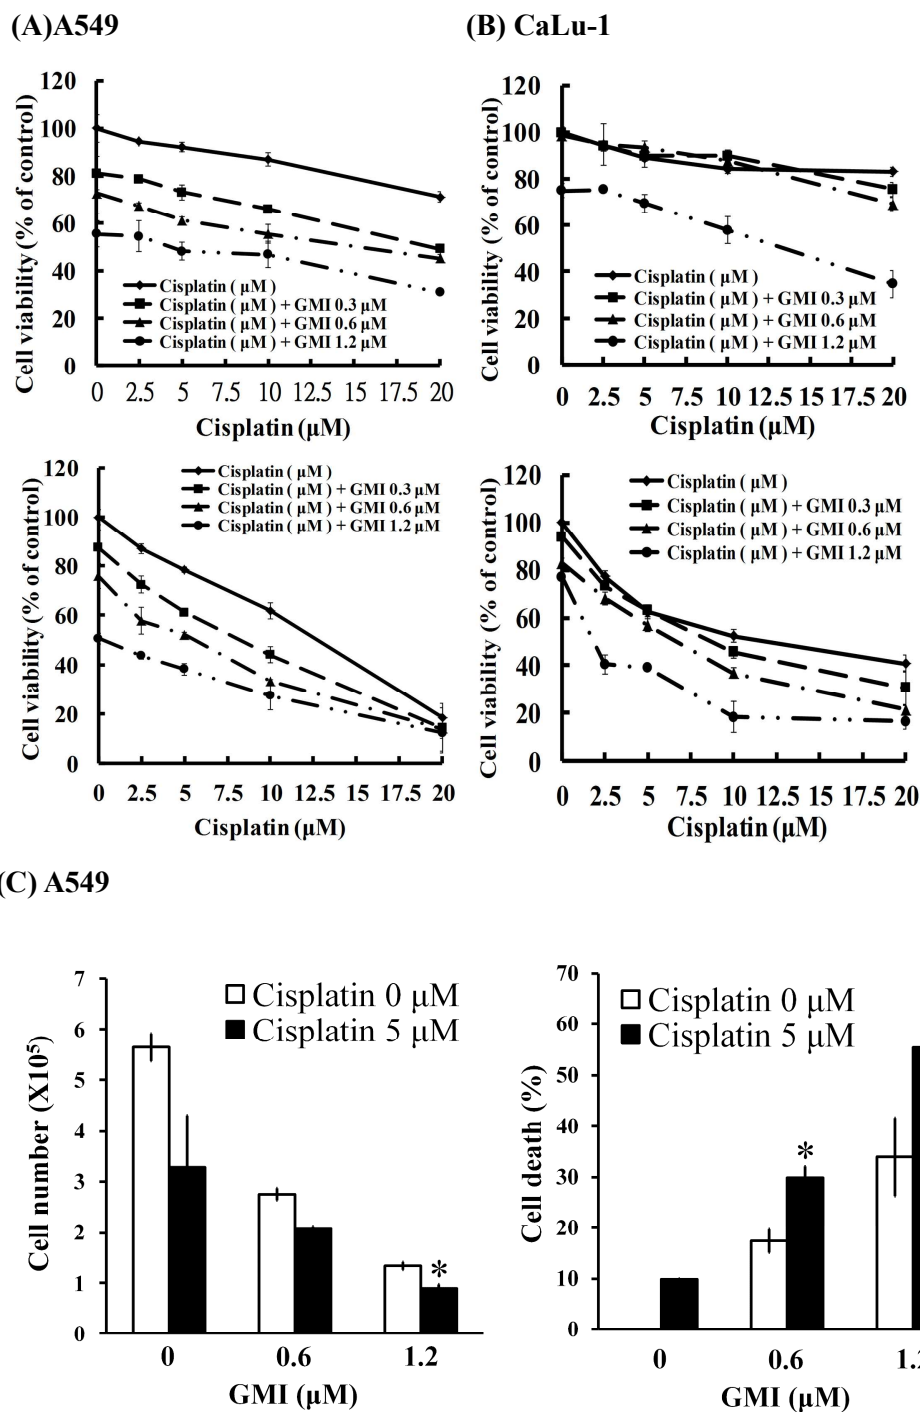

### Supplementary Figure 1

(A, B) A549 cells and CaLu-1 cells ( $5 \times 10^3$  cells/well of 96-well dish) were co-treated with various concentrations of cisplatin (0, 2.5, 5, 10, 20  $\mu\text{M}$ ) and GMI (0, 0.3, 0.6 and 1.2  $\mu\text{M}$ ) for 24 and 48 h. MTT assay was carried out to estimate cell viability.

(C) A549 cells ( $2 \times 10^5$  cells/well of 6-well dish) were co-treated with cisplatin and GMI for 48 h. The cells were harvested by trypsin and stained by trypan blue.

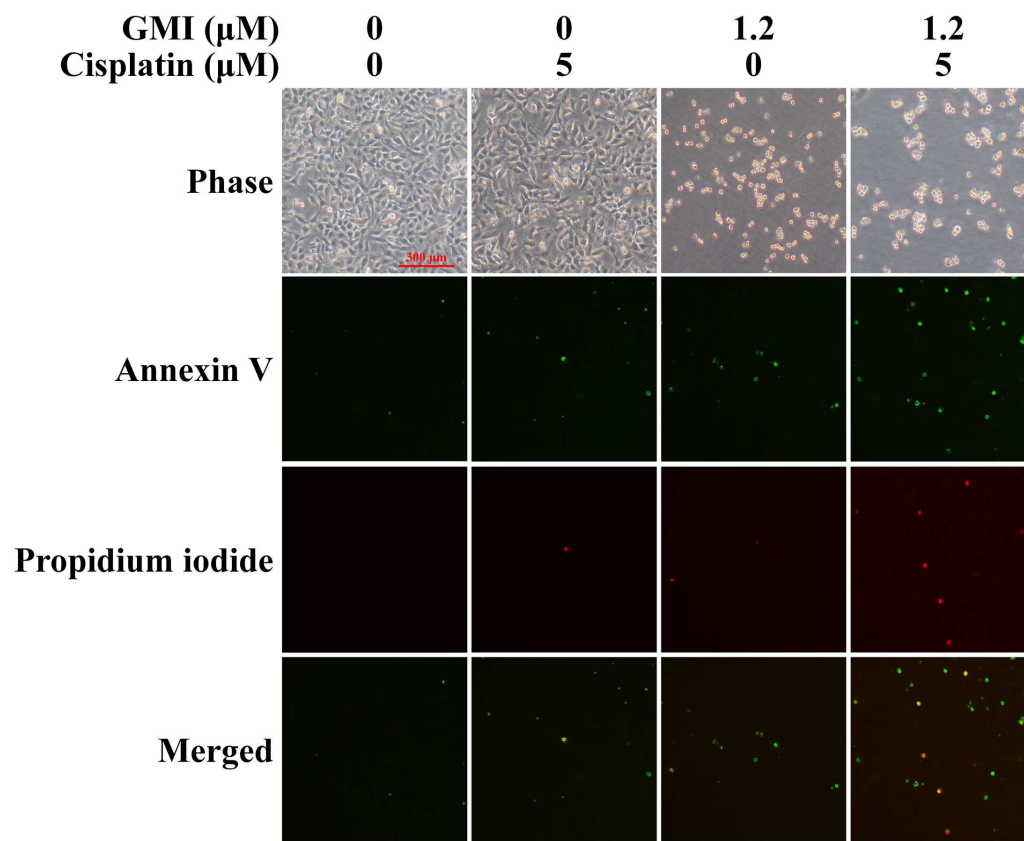

### Supplementary Figure 2

A549 cells ( $5 \times 10^4$  cells/well of 24-well dish) were co-treated with cisplatin and GMI for 48 h followed by Annexin V-FITC/Propidium iodide staining and observation under fluorescence microscope. Scale bar indicates 300  $\mu\text{m}$ .

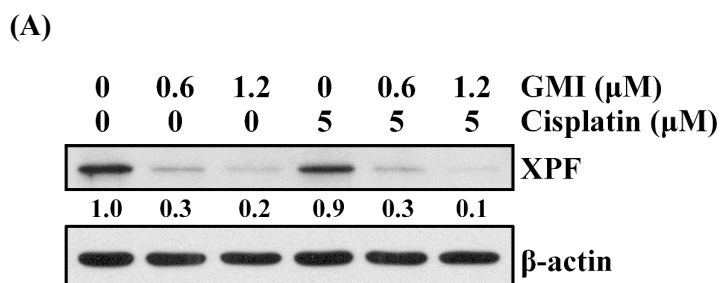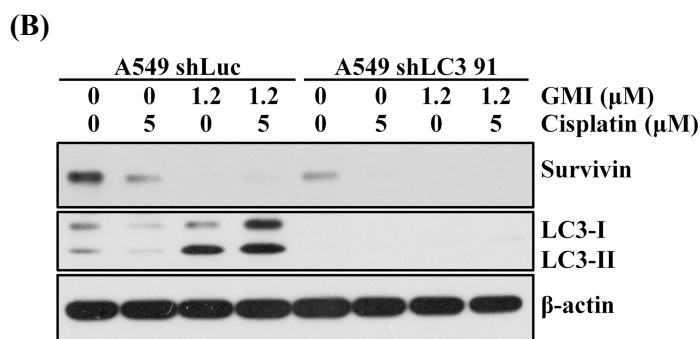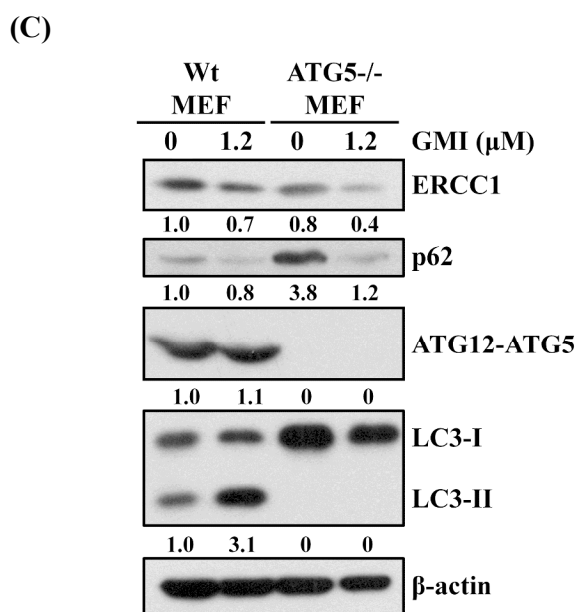

### Supplementary Figure 3

(A) Equal amounts of total cell lysates from treated A549 cells were analyzed on Western blot.  $\beta$ -actin served as a loading control.

(B) Survivin and LC3 were determined by Western blotting after A549 shLuc and shLC3 cells ( $5 \times 10^5$ /60 mm dish) were co-treated with cisplatin (0 and 5  $\mu$ M) and GMI (0, 0.6, and 1.2  $\mu$ M) for 48 h.

(B) Equal amounts of total cell lysates from GMI-treated wild-type (WT) and ATG5<sup>-/-</sup> mouse embryonic fibroblast cells ( $3 \times 10^5$  cells/60 mm dish) were analyzed on Western blot.  $\beta$ -actin served as a loading control.
